# Supplementary material for: Introducing charge tag via click reaction in living cells for single cell mass spectrometry
Source: Royal Society of Chemistry journal article supplement (doi:10.1039/d0sc00259c), 2020-01-01
Supplement: d0sc00259c1.pdf [file d0sc00259c1.pdf]

## Electronic Supporting Information

### Introducing Charge Tag via Click Reaction in Living Cells for Single Cell Mass Spectrometry

Meihui Zhuang,<sup>‡</sup><sup>a</sup> Zhuanghao Hou,<sup>‡</sup><sup>a</sup> Peiyao Chen,<sup>a</sup> Gaolin Liang,<sup>a</sup> Guangming Huang<sup>\*ab</sup>

<sup>a</sup>Hefei National Laboratory for Physical Sciences at the Microscale, School of Chemistry and Materials Science, University of Science and Technology of China, Hefei, Anhui, 230026, P. R. China

<sup>b</sup>National Synchrotron Radiation Laboratory, University of Science and Technology of China, Hefei, Anhui, 230029, P.R. China

\*E-mail: [gmhuang@ustc.edu.cn](mailto:gmhuang@ustc.edu.cn)

<sup>‡</sup> These authors contributed equally to this work.

## Table of Contents

|                                                                                                                             |     |
|-----------------------------------------------------------------------------------------------------------------------------|-----|
| <b>Syntheses of NCBT</b> .....                                                                                              | S3  |
| <b>Fig. S1.</b> Schematic of single cell experimental workflow for treatment of cells .....                                 | S4  |
| <b>Fig. S2.</b> Characterizations of NCBT .....                                                                             | S5  |
| <b>Fig. S3.</b> Metabolites changes in single living HeLa cells with and without NCBT .....                                 | S6  |
| <b>Fig. S4.</b> MS spectra of 100 $\mu$ M Cys in artificial intracellular solution .....                                    | S7  |
| <b>Fig. S5.</b> Detection of total Cys in FBS samples .....                                                                 | S8  |
| <b>Fig. S6.</b> The cell lysate experiments of erastin stimulation .....                                                    | S9  |
| <b>Table S1.</b> Representative metabolites species detected in FBS with and without NCBT derivatization.....               | S10 |
| <b>Table S2.</b> Representative metabolites species detected in single HeLa cell with and without NCBT derivatization ..... | S12 |
| <b>References</b> .....                                                                                                     | S14 |

## Syntheses of NCBT

**Scheme S1.** The synthetic route for NCBT

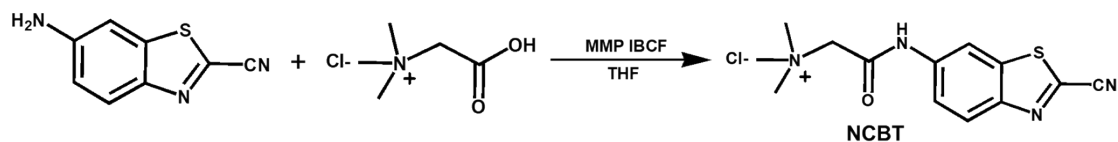

Synthesis of NCBT: Isobutyl chloroformate (IBCF, 20  $\mu$ L, 0.15 mmol) was added to the mixture of betaine hydrochloride (23 mg, 0.15 mmol) and 4-methylmorpholine (MMP, 33  $\mu$ L, 0.3 mmol) in tetrahydrofuran (THF, 2 mL). The mixture was stirred at 0  $^{\circ}$ C for 30 min. The solution of 2-cyano-6-aminobenzothiazole (CBT, 8.8 mg, 0.05 mmol) was added to the reaction mixture and further stirred at 0  $^{\circ}$ C for 1 h. Then the mixture was stirred at room temperature overnight. The pure product NCBT was obtained after high performance liquid chromatography purification. High performance liquid chromatography analyses were performed on an Agilent 1200 HPLC system equipped with a G1322A pump and in-line diode array UV detector using an Agilent Zorbax 300SB-C18 RP column with acetonitrile and water (0.1% of TFA) as the eluent.

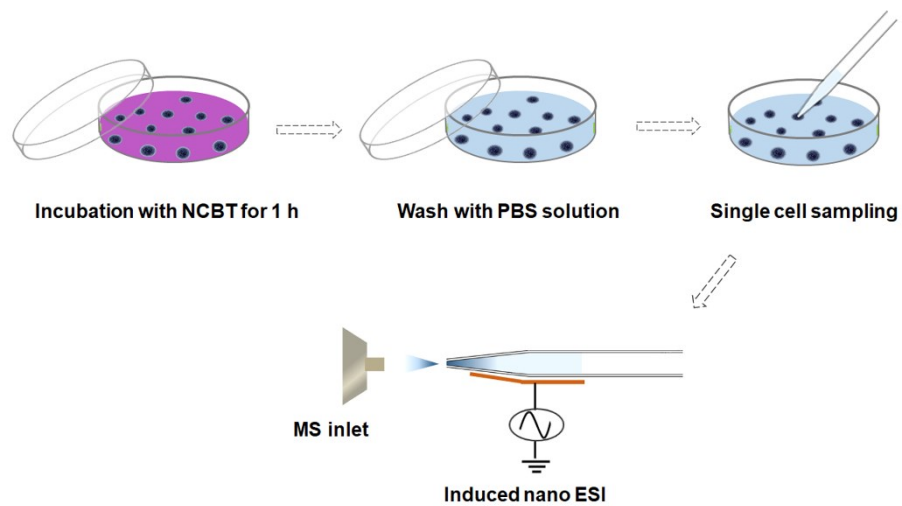

**Fig. S1** Schematic of single cell experimental workflow for treatment of cells. i) incubation: The cells was incubated with 200  $\mu\text{M}$  NCBT in serum-free medium (avoid Cys contained in serum that could react with NCBT) at 37  $^{\circ}\text{C}$  under 5%  $\text{CO}_2$  for 1 h; ii) wash: The cells was washed by PBS solution three times and then subjected to single cell sampling; iii) sampling: The cytoplasm was withdrawn using borosilicate glass pipettes controlled with micromanipulator; iv) analysis: The micropipette after sampling was directed with InESI-MS.

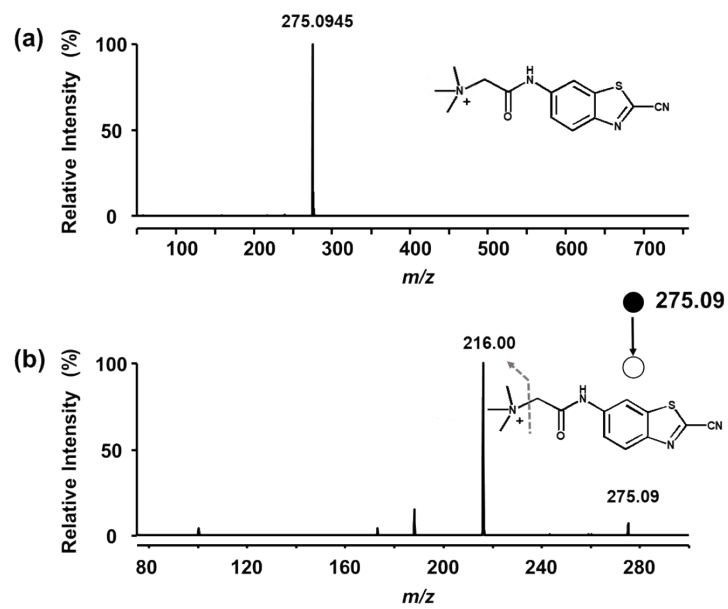

**Fig. S2** Characterizations of NCBT. (a) MS spectra and (b) MS/MS spectra of synthetic NCBT.

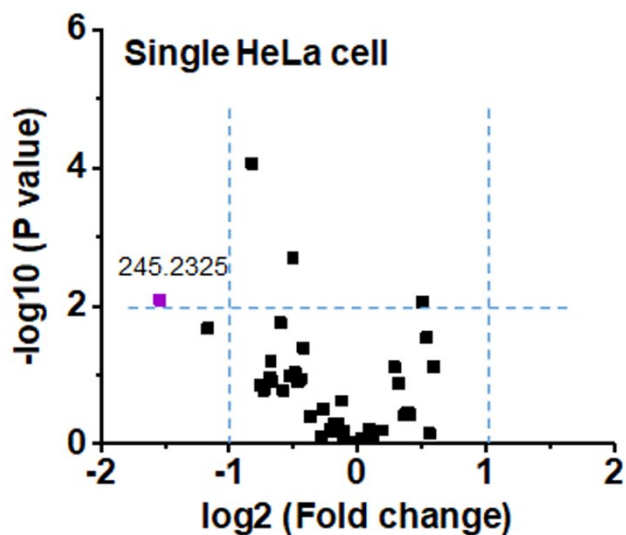

**Fig. S3** Metabolites changes in single living HeLa cells with (n = 30) and without (n = 46) 200  $\mu$ M NCBT for 1 h. The purple square denotes metabolite have significant change.

For single cell analysis, we visualized the data as a volcano plot and significant difference was termed as both P value < 0.01 and fold change > | 2 |.<sup>1-2</sup> As shown in Fig. S3, only one metabolites (m/z 245.2325) according to list in Table S2 (except m/z 379.0881) showed a significant downregulation after NCBT derivatization. Thus, NCBT has little effect on intracellular metabolites. In order to minimize the possible influence on metabolome, we recommend reducing the concentration of derivatization reagents (such as 50  $\mu$ M) when conducting metabolite studies, and the reaction efficiency could be compensated by extending the incubation time (such as 2-3 h).

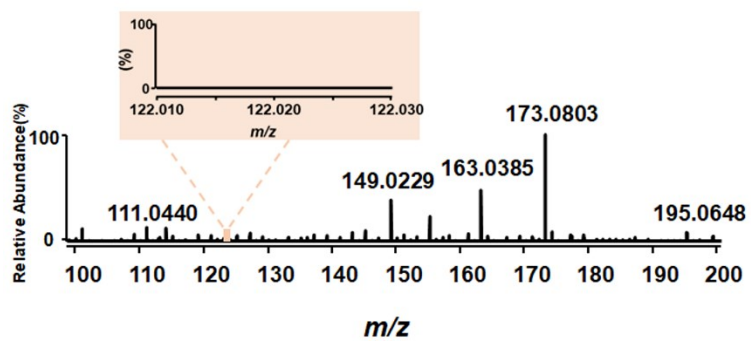

**Fig. S4** MS spectra of 100  $\mu$ M Cys in artificial intracellular solution. Insert: magnified Cys MS spectra signal. The theoretical  $m/z$  of [Cys + H]<sup>+</sup> is 122.0270, which showed no significant MS response under current condition.

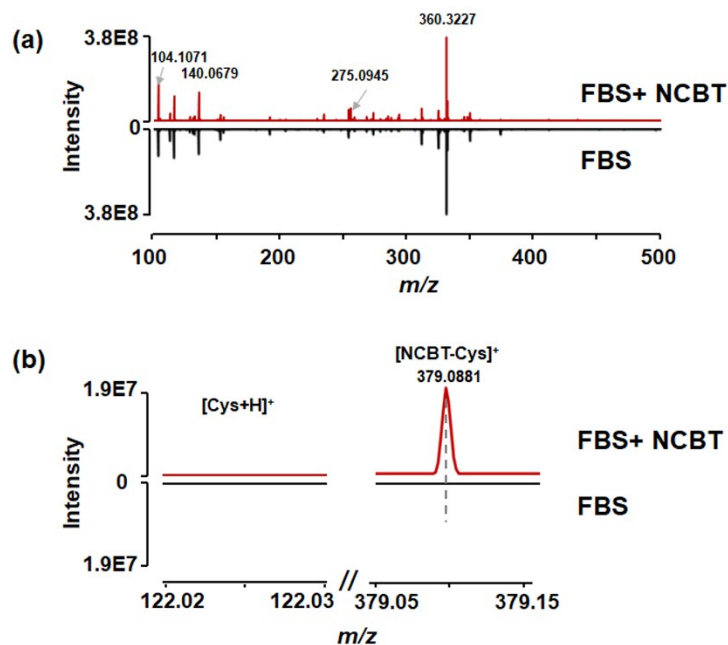

**Fig. S5** Detection of total Cys in FBS samples. (a) MS spectra obtained from FBS samples with (FBS + NCBT) and without (FBS) NCBT derivatization. (b) The expand view of MS spectra of protonated Cys ( $m/z$  122.0278) and NCBT-Cys ( $m/z$  379.0881).

Total Cys (tCys) in plasma/serum is a risk factor for atherosclerosis in hyperlipidemic patients,<sup>3</sup> and tCys is also associated with vascular disease in the coronary, cerebral, and peripheral arteries.<sup>4</sup> tCys in FBS samples was tested and corresponding mass spectra was shown in Fig. S5a, with detailed spectra zoomed in Fig. S5b. It was found that, only for NCBT incubated FBS, NCBT-Cys ( $m/z$  379.0881) could be detected with ion intensity of  $\sim 1.9E7$ . While raw Cys in FBS samples with or without NCBT incubation remained undetectable. Thus, the present method could significantly enhance the sensitivity for tCys in serum. In addition, a variety of other metabolite molecules in FBS samples could be detected in presence of excess NCBT, as listed in Table S1.



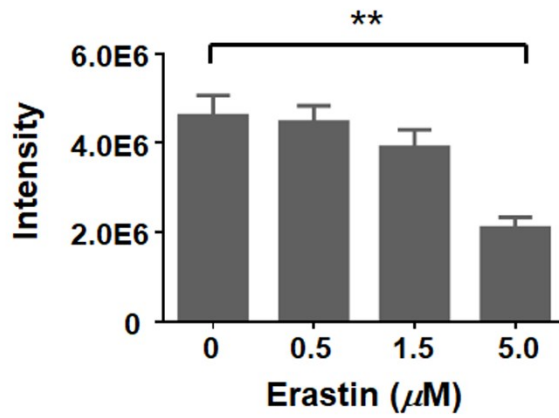

**Fig. S6** The cell lysate experiments of erastin stimulation. The MS signal intensity of NCBT-Cys ( $m/z$  379.0881) in HeLa cell after erastin stimulation at different concentrations. ( $P < 0.05$  correlated by false discovery rate) \*\*denotes  $P < 0.01$ ; All error bars denote s.d.;  $n = 3$ .  $\sim 1E5$  of HeLa cells incubated with different concentration erastin (0, 0.5, 1.5 and 5.0  $\mu\text{M}$ ) for 2 h, then the cells was incubated with 200  $\mu\text{M}$  NCBT for 1 h. The cells were washed by PBS solution and lysed in 100  $\mu\text{L}$  pure  $\text{H}_2\text{O}$  solution.

Compared with untreated cells, the level of NCBT-Cys showed no significant down-regulation for cell lysates with 0.5 and 1.5  $\mu\text{M}$  erastin treatment ( $P > 0.05$ ), and that level changed dramatically ( $P < 0.01$ ) with erastin treatment up to 5.0  $\mu\text{M}$ . Less generation of Cys with erastin was similar with single cell and cell lysate experiments.

**Table S1.** Representative metabolites species detected in FBS with and without NCBT derivatization

| No. | Measured m/z | Theoretical m/z | Relative error (ppm) | Formula                                                      | Ion type            | Name                                          |
|-----|--------------|-----------------|----------------------|--------------------------------------------------------------|---------------------|-----------------------------------------------|
| 1   | 104.0708     | 104.0706        | +1.92                | C <sub>4</sub> H <sub>9</sub> NO <sub>2</sub>                | [M+H] <sup>+</sup>  | GABA                                          |
|     | 126.0525     | 126.0525        | 0                    |                                                              | [M+Na] <sup>+</sup> |                                               |
| 2   | 104.1071     | 104.1070        | +0.96                | C <sub>5</sub> H <sub>14</sub> NO                            | [M] <sup>+</sup>    | Choline                                       |
| 3   | 112.0371     | 112.0369        | +1.79                | C <sub>3</sub> H <sub>7</sub> NO <sub>2</sub>                | [M+Na] <sup>+</sup> | Alanine                                       |
| 4   | 112.0506     | 112.0505        | +0.89                | C <sub>4</sub> H <sub>5</sub> N <sub>3</sub> O               | [M+H] <sup>+</sup>  | Cytosine                                      |
| 5   | 114.0661     | 114.0662        | -0.88                | C <sub>4</sub> H <sub>7</sub> N <sub>3</sub> O               | [M+H] <sup>+</sup>  | Creatinine                                    |
|     | 136.0477     | 136.0482        | -3.67                |                                                              | [M+Na] <sup>+</sup> |                                               |
|     | 152.0218     | 152.0221        | -1.97                |                                                              | [M+K] <sup>+</sup>  |                                               |
| 6   | 115.0366     | 115.0366        | 0                    | C <sub>3</sub> H <sub>8</sub> O <sub>3</sub>                 | [M+Na] <sup>+</sup> | Glycerol                                      |
| 7   | 116.0705     | 116.0706        | -0.86                | C <sub>5</sub> H <sub>9</sub> NO <sub>2</sub>                | [M+H] <sup>+</sup>  | Proline                                       |
|     | 138.0523     | 138.0526        | -2.17                |                                                              | [M+Na] <sup>+</sup> |                                               |
| 8   | 118.0861     | 118.0863        | -1.69                | C <sub>5</sub> H <sub>11</sub> NO <sub>2</sub>               | [M+H] <sup>+</sup>  | Valine                                        |
|     | 140.0678     | 140.0682        | -2.86                |                                                              | [M+Na] <sup>+</sup> |                                               |
|     | 156.0418     | 156.0421        | -1.92                |                                                              | [M+K] <sup>+</sup>  |                                               |
| 9   | 129.0656     | 129.0659        | -2.32                | C <sub>5</sub> H <sub>8</sub> N <sub>2</sub> O <sub>2</sub>  | [M+H] <sup>+</sup>  | Pyroglutamine and isomers                     |
|     | 151.0475     | 151.0478        | -1.99                |                                                              | [M+Na] <sup>+</sup> |                                               |
| 10  | 130.0497     | 130.0499        | -1.54                | C <sub>5</sub> H <sub>7</sub> NO <sub>3</sub>                | [M+H] <sup>+</sup>  | Pyroglutamic acid                             |
|     | 152.0315     | 152.0318        | -1.97                |                                                              | [M+Na] <sup>+</sup> |                                               |
| 11  | 130.0859     | 130.0863        | -3.07                | C <sub>6</sub> H <sub>11</sub> NO <sub>2</sub>               | [M+H] <sup>+</sup>  | Pipelicolic acid                              |
|     | 152.0679     | 152.0682        | -1.97                |                                                              | [M+Na] <sup>+</sup> |                                               |
| 12  | 132.0766     | 132.0768        | -1.51                | C <sub>4</sub> H <sub>9</sub> N <sub>3</sub> O <sub>2</sub>  | [M+H] <sup>+</sup>  | Creatine                                      |
|     | 154.0582     | 154.0587        | -3.24                |                                                              | [M+Na] <sup>+</sup> |                                               |
|     | 170.0323     | 170.0326        | -1.76                |                                                              | [M+K] <sup>+</sup>  |                                               |
| 13  | 132.1014     | 132.1019        | -3.78                | C <sub>6</sub> H <sub>13</sub> NO <sub>2</sub>               | [M+H] <sup>+</sup>  | Leucine and isomers                           |
|     | 154.0836     | 154.0839        | -1.95                |                                                              | [M+Na] <sup>+</sup> |                                               |
| 14  | 133.0970     | 133.0972        | -1.50                | C <sub>5</sub> H <sub>12</sub> N <sub>2</sub> O <sub>2</sub> | [M+H] <sup>+</sup>  | Ornithine                                     |
| 15  | 137.0450     | 137.0458        | -5.84                | C <sub>5</sub> H <sub>4</sub> N <sub>4</sub> O               | [M+H] <sup>+</sup>  | Hypoxanthine                                  |
| 16  | 141.0654     | 141.0659        | -3.54                | C <sub>6</sub> H <sub>8</sub> N <sub>2</sub> O <sub>2</sub>  | [M+H] <sup>+</sup>  | 1,3-Dimethyluracil<br>Imidazolepropionic acid |
| 17  | 142.0473     | 142.0475        | -1.41                | C <sub>4</sub> H <sub>9</sub> NO <sub>3</sub>                | [M+Na] <sup>+</sup> | Threonine                                     |
| 18  | 146.1173     | 146.1175        | -1.37                | C <sub>7</sub> H <sub>16</sub> NO <sub>2</sub>               | [M] <sup>+</sup>    | Acetylcholine                                 |
| 19  | 147.0760     | 147.0764        | -2.72                | C <sub>5</sub> H <sub>10</sub> N <sub>2</sub> O <sub>3</sub> | [M+H] <sup>+</sup>  | Glutamine                                     |
|     | 169.0581     | 169.0584        | -1.77                |                                                              | [M+Na] <sup>+</sup> |                                               |
| 20  | 147.1123     | 147.1128        | -3.40                | C <sub>6</sub> H <sub>14</sub> N <sub>2</sub> O <sub>2</sub> | [M+H] <sup>+</sup>  | Lysine                                        |
|     | 169.0945     | 169.0948        | -1.77                |                                                              | [M+Na] <sup>+</sup> |                                               |
| 21  | 148.0036     | 148.0039        | -2.03                | C <sub>2</sub> H <sub>7</sub> NO <sub>3</sub> S              | [M+Na] <sup>+</sup> | Taurine                                       |
| 22  | 150.0582     | 150.0583        | -0.67                | C <sub>5</sub> H <sub>11</sub> NO <sub>2</sub> S             | [M+H] <sup>+</sup>  | Methionine                                    |
|     | 172.0400     | 172.0403        | -1.74                |                                                              | [M+Na] <sup>+</sup> |                                               |
| 23  | 155.0424     | 155.0427        | -1.93                | C <sub>4</sub> H <sub>8</sub> N <sub>2</sub> O <sub>3</sub>  | [M+Na] <sup>+</sup> | Asparagine                                    |
| 24  | 156.0763     | 156.0768        | -3.20                | C <sub>6</sub> H <sub>9</sub> N <sub>3</sub> O <sub>2</sub>  | [M+H] <sup>+</sup>  | Histidine                                     |
|     | 178.0576     | 178.0587        | -6.18                |                                                              | [M+Na] <sup>+</sup> |                                               |
| 25  | 160.1328     | 160.1332        | -2.50                | C <sub>8</sub> H <sub>17</sub> NO <sub>2</sub>               | [M+H] <sup>+</sup>  | 2-Aminooctanoic acid                          |
| 26  | 161.1282     | 161.1285        | -1.85                | C <sub>7</sub> H <sub>16</sub> N <sub>2</sub> O <sub>2</sub> | [M+H] <sup>+</sup>  | N(6)-Methyllysine                             |
| 27  | 162.1120     | 162.1125        | -3.08                | C <sub>7</sub> H <sub>15</sub> NO <sub>3</sub>               | [M+H] <sup>+</sup>  | Carnitine                                     |
|     | 184.0941     | 184.0944        | -1.63                |                                                              | [M+Na] <sup>+</sup> |                                               |
| 28  | 166.0859     | 166.0863        | -2.41                | C <sub>9</sub> H <sub>11</sub> NO <sub>2</sub>               | [M+H] <sup>+</sup>  | Phenylalanine                                 |
|     | 188.0677     | 188.0682        | -2.66                |                                                              | [M+Na] <sup>+</sup> |                                               |
| 29  | 168.0628     | 168.0631        | -1.79                | C <sub>6</sub> H <sub>11</sub> NO <sub>3</sub>               | [M+Na] <sup>+</sup> | Butyrylglycine and isomers                    |
| 30  | 169.0581     | 169.0584        | -1.77                | C <sub>5</sub> H <sub>10</sub> N <sub>2</sub> O <sub>3</sub> | [M+Na] <sup>+</sup> | Glutamine                                     |
| 31  | 170.0421     | 170.0424        | -1.76                | C <sub>5</sub> H <sub>9</sub> NO <sub>4</sub>                | [M+Na] <sup>+</sup> | Glutamic acid                                 |
| 32  | 170.0921     | 170.0924        | -1.76                | C <sub>7</sub> H <sub>11</sub> N <sub>3</sub> O <sub>2</sub> | [M+H] <sup>+</sup>  | Methylhistidine                               |
|     | 192.0740     | 192.0744        | -1.56                |                                                              | [M+Na] <sup>+</sup> |                                               |

|    |          |          |       |                                                                              |                     |                                                   |
|----|----------|----------|-------|------------------------------------------------------------------------------|---------------------|---------------------------------------------------|
| 33 | 175.1090 | 175.1077 | +7.42 | C <sub>7</sub> H <sub>14</sub> N <sub>2</sub> O <sub>3</sub>                 | [M+H] <sup>+</sup>  | N-Acetylornithine                                 |
|    | 197.0893 | 197.0897 | -2.03 |                                                                              | [M+Na] <sup>+</sup> |                                                   |
| 34 | 175.1184 | 175.1190 | -3.43 | C <sub>6</sub> H <sub>14</sub> N <sub>4</sub> O <sub>2</sub>                 | [M+H] <sup>+</sup>  | Arginine                                          |
|    | 197.1006 | 197.1009 | -1.52 |                                                                              | [M+Na] <sup>+</sup> |                                                   |
| 35 | 182.0784 | 182.0788 | -2.19 | C <sub>7</sub> H <sub>13</sub> NO <sub>3</sub>                               | [M+Na] <sup>+</sup> | Methyl 5-(hydroxymethyl)pyrrolidine-3-carboxylate |
| 36 | 188.1754 | 188.1757 | -1.59 | C <sub>9</sub> H <sub>21</sub> N <sub>3</sub> O                              | [M+H] <sup>+</sup>  | N1-Acetylspermidine and isomers                   |
| 37 | 203.0522 | 203.0526 | -1.97 | C <sub>6</sub> H <sub>12</sub> O <sub>6</sub>                                | [M+Na] <sup>+</sup> | Hexose                                            |
|    | 219.0261 | 219.0265 | -1.83 |                                                                              | [M+K] <sup>+</sup>  |                                                   |
| 38 | 203.1499 | 203.1503 | -1.97 | C <sub>8</sub> H <sub>18</sub> N <sub>4</sub> O <sub>2</sub>                 | [M+H] <sup>+</sup>  | Dimethylarginine                                  |
| 39 | 204.0628 | 204.0631 | -1.47 | C <sub>9</sub> H <sub>11</sub> NO <sub>3</sub>                               | [M+Na] <sup>+</sup> | Tyrosine                                          |
| 40 | 204.1225 | 204.1230 | -2.45 | C <sub>9</sub> H <sub>17</sub> NO <sub>4</sub>                               | [M+H] <sup>+</sup>  | Acetylcarnitine                                   |
|    | 226.1045 | 226.1050 | -2.21 |                                                                              | [M+Na] <sup>+</sup> |                                                   |
| 41 | 205.0968 | 205.0972 | -1.95 | C <sub>11</sub> H <sub>12</sub> N <sub>2</sub> O <sub>2</sub>                | [M+H] <sup>+</sup>  | Tryptophan                                        |
|    | 227.0786 | 227.0791 | -2.20 |                                                                              | [M+Na] <sup>+</sup> |                                                   |
| 42 | 218.1379 | 218.1387 | -3.67 | C <sub>10</sub> H <sub>19</sub> NO <sub>4</sub>                              | [M+H] <sup>+</sup>  | Propionylcarnitine                                |
| 43 | 227.0786 | 227.0791 | -2.20 | C <sub>11</sub> H <sub>12</sub> N <sub>2</sub> O <sub>2</sub>                | [M+Na] <sup>+</sup> | Tryptophan                                        |
| 44 | 232.1536 | 232.1543 | -3.02 | C <sub>11</sub> H <sub>21</sub> NO <sub>4</sub>                              | [M+H] <sup>+</sup>  | Butyrylcarnitine and isomers                      |
| 45 | 234.1332 | 234.1336 | -1.71 | C <sub>10</sub> H <sub>19</sub> NO <sub>5</sub>                              | [M+H] <sup>+</sup>  | Hydroxypropionylcarnitine                         |
| 46 | 242.0993 | 242.0999 | -2.48 | C <sub>9</sub> H <sub>17</sub> NO <sub>5</sub>                               | [M+Na] <sup>+</sup> | Pantothenic acid                                  |
| 47 | 245.0778 | 245.0768 | +4.08 | C <sub>9</sub> H <sub>12</sub> N <sub>2</sub> O <sub>6</sub>                 | [M+H] <sup>+</sup>  | Uridine                                           |
| 48 | 256.2628 | 256.2635 | -2.73 | C <sub>16</sub> H <sub>33</sub> NO                                           | [M+H] <sup>+</sup>  | Palmitic amide                                    |
|    | 278.2446 | 278.2455 | -3.23 |                                                                              | [M+Na] <sup>+</sup> |                                                   |
|    | 294.2189 | 294.2194 | -1.70 |                                                                              | [M+K] <sup>+</sup>  |                                                   |
| 49 | 265.0789 | 265.0795 | -2.26 | C <sub>10</sub> H <sub>14</sub> N <sub>2</sub> O <sub>5</sub>                | [M+Na] <sup>+</sup> | Thymidine                                         |
| 50 | 280.2628 | 280.2635 | -2.50 | C <sub>18</sub> H <sub>33</sub> NO                                           | [M+H] <sup>+</sup>  | Linoleamide                                       |
|    | 302.2447 | 302.2454 | -2.32 |                                                                              | [M+Na] <sup>+</sup> |                                                   |
| 51 | 282.2785 | 282.2791 | -2.13 | C <sub>18</sub> H <sub>35</sub> NO                                           | [M+H] <sup>+</sup>  | Oleamide                                          |
|    | 304.2602 | 304.2611 | -2.96 |                                                                              | [M+Na] <sup>+</sup> |                                                   |
| 52 | 284.2941 | 284.2948 | -2.46 | C <sub>18</sub> H <sub>37</sub> NO                                           | [M+H] <sup>+</sup>  | Octadecanamide                                    |
|    | 306.2760 | 306.2767 | -2.29 |                                                                              | [M+Na] <sup>+</sup> |                                                   |
| 53 | 300.2890 | 300.2897 | -2.33 | C <sub>18</sub> H <sub>37</sub> NO <sub>2</sub>                              | [M+H] <sup>+</sup>  | Sphingosine and isomers                           |
|    | 322.2717 | 322.2716 | -2.79 |                                                                              | [M+Na] <sup>+</sup> |                                                   |
| 54 | 302.3046 | 302.3054 | -1.33 | C <sub>18</sub> H <sub>39</sub> NO <sub>2</sub>                              | [M+H] <sup>+</sup>  | Sphinganine                                       |
| 55 | 318.2996 | 318.3003 | -2.20 | C <sub>18</sub> H <sub>39</sub> NO <sub>3</sub>                              | [M+H] <sup>+</sup>  | Phytosphingosine                                  |
|    | 340.2815 | 340.2822 | -2.06 |                                                                              | [M+Na] <sup>+</sup> |                                                   |
| 56 | 324.2885 | 324.2897 | -3.70 | C <sub>20</sub> H <sub>37</sub> NO <sub>2</sub>                              | [M+H] <sup>+</sup>  | Linoleoyl ethanolamide                            |
|    | 346.2711 | 346.2717 | -1.73 |                                                                              | [M+Na] <sup>+</sup> |                                                   |
| 57 | 348.2865 | 348.2873 | -2.30 | C <sub>20</sub> H <sub>39</sub> NO <sub>2</sub>                              | [M+Na] <sup>+</sup> | N-Oleylethanolamine                               |
| 58 | 379.0881 | 379.0893 | -3.17 | C <sub>16</sub> H <sub>19</sub> N <sub>4</sub> O <sub>3</sub> S <sub>2</sub> | [M] <sup>+</sup>    | NCBT-Cys                                          |
| 59 | 386.3253 | 386.3265 | -3.11 | C <sub>22</sub> H <sub>43</sub> NO <sub>4</sub>                              | [M+H] <sup>+</sup>  | Pentadecanoylcarnitine                            |
|    | 408.3075 | 408.3084 | -2.20 |                                                                              | [M+Na] <sup>+</sup> |                                                   |
|    | 424.2815 | 424.2824 | -2.12 |                                                                              | [M+K] <sup>+</sup>  |                                                   |

The peak assignments were based on accurate mass measurements, comparison of isotopic patterns, information found in databases, such as Human metabolome database (<http://www.hmdb.ca/>), and some previous related literatures. The relative error of m/z values was set as < 10 ppm. Protonated ion [M + H]<sup>+</sup>, sodium adduct ion [M + Na]<sup>+</sup>, and potassium adduct ion [M + K]<sup>+</sup> peaks would be counted as one chemical.

**Table S2.** Representative metabolites species detected in single HeLa cell with and without NCBT derivatization

| No. | Measured m/z | Theoretical m/z | Relative error (ppm) | Formula                                                                      | Ion type            | Name                            |
|-----|--------------|-----------------|----------------------|------------------------------------------------------------------------------|---------------------|---------------------------------|
| 1   | 104.0708     | 104.0706        | +1.92                | C <sub>4</sub> H <sub>9</sub> NO <sub>2</sub>                                | [M+H] <sup>+</sup>  | GABA                            |
| 2   | 104.1071     | 104.1070        | +0.96                | C <sub>5</sub> H <sub>14</sub> NO                                            | [M] <sup>+</sup>    | Choline                         |
| 3   | 114.0661     | 114.0662        | -0.88                | C <sub>4</sub> H <sub>7</sub> N <sub>3</sub> O                               | [M+H] <sup>+</sup>  | Creatinine                      |
|     | 136.0477     | 136.0482        | -3.67                |                                                                              | [M+Na] <sup>+</sup> |                                 |
| 4   | 115.0366     | 115.0366        | 0                    | C <sub>3</sub> H <sub>8</sub> O <sub>3</sub>                                 | [M+Na] <sup>+</sup> | Glycerol                        |
| 5   | 116.0705     | 116.0706        | -0.86                | C <sub>5</sub> H <sub>9</sub> NO <sub>2</sub>                                | [M+H] <sup>+</sup>  | Proline                         |
| 6   | 118.0861     | 118.0863        | -1.69                | C <sub>5</sub> H <sub>11</sub> NO <sub>2</sub>                               | [M+H] <sup>+</sup>  | Valine                          |
|     | 140.0678     | 140.0682        | -2.86                |                                                                              | [M+Na] <sup>+</sup> |                                 |
| 7   | 120.0654     | 120.0655        | -0.83                | C <sub>4</sub> H <sub>9</sub> NO <sub>3</sub>                                | [M+H] <sup>+</sup>  | Threonine                       |
| 8   | 129.0656     | 129.0659        | -2.32                | C <sub>5</sub> H <sub>8</sub> N <sub>2</sub> O <sub>2</sub>                  | [M+H] <sup>+</sup>  | Pyroglutamine and isomers       |
| 9   | 130.0497     | 130.0499        | -1.54                | C <sub>5</sub> H <sub>7</sub> NO <sub>3</sub>                                | [M+H] <sup>+</sup>  | Pyroglutamic acid               |
| 10  | 130.0859     | 130.0863        | -3.07                | C <sub>6</sub> H <sub>11</sub> NO <sub>2</sub>                               | [M+H] <sup>+</sup>  | Pipecolic acid                  |
| 11  | 131.1177     | 131.1179        | -1.53                | C <sub>6</sub> H <sub>14</sub> N <sub>2</sub> O                              | [M+H] <sup>+</sup>  | N-Acetylputrescine              |
| 12  | 132.0766     | 132.0768        | -1.51                | C <sub>4</sub> H <sub>9</sub> N <sub>3</sub> O <sub>2</sub>                  | [M+H] <sup>+</sup>  | Creatine                        |
|     | 154.0582     | 154.0587        | -3.24                |                                                                              | [M+Na] <sup>+</sup> |                                 |
| 13  | 132.1014     | 132.1019        | -3.78                | C <sub>6</sub> H <sub>13</sub> NO <sub>2</sub>                               | [M+H] <sup>+</sup>  | Leucine and isomers             |
| 14  | 146.1173     | 146.1175        | -1.37                | C <sub>7</sub> H <sub>16</sub> NO <sub>2</sub>                               | [M] <sup>+</sup>    | Acetylcholine                   |
| 15  | 146.1650     | 146.1652        | -1.37                | C <sub>7</sub> H <sub>19</sub> N <sub>3</sub>                                | [M+H] <sup>+</sup>  | Spermidine                      |
|     | 168.1465     | 168.1471        | -3.57                |                                                                              | [M+Na] <sup>+</sup> |                                 |
| 16  | 147.0760     | 147.0764        | -2.72                | C <sub>5</sub> H <sub>10</sub> N <sub>2</sub> O <sub>3</sub>                 | [M+H] <sup>+</sup>  | Glutamine                       |
| 17  | 147.1123     | 147.1128        | -3.40                | C <sub>6</sub> H <sub>14</sub> N <sub>2</sub> O <sub>2</sub>                 | [M+H] <sup>+</sup>  | Lysine                          |
| 18  | 156.0763     | 156.0768        | -3.20                | C <sub>6</sub> H <sub>9</sub> N <sub>3</sub> O <sub>2</sub>                  | [M+H] <sup>+</sup>  | Histidine                       |
|     | 178.0576     | 178.0587        | -6.18                |                                                                              | [M+Na] <sup>+</sup> |                                 |
| 19  | 160.1328     | 160.1332        | -2.50                | C <sub>8</sub> H <sub>17</sub> NO <sub>2</sub>                               | [M+H] <sup>+</sup>  | 2-Amino-octanoic acid           |
| 20  | 162.1120     | 162.1125        | -3.08                | C <sub>7</sub> H <sub>15</sub> NO <sub>3</sub>                               | [M+H] <sup>+</sup>  | Carnitine                       |
| 21  | 166.0859     | 166.0863        | -2.41                | C <sub>9</sub> H <sub>11</sub> NO <sub>2</sub>                               | [M+H] <sup>+</sup>  | Phenylalanine                   |
| 22  | 175.1184     | 175.1190        | -3.43                | C <sub>6</sub> H <sub>14</sub> N <sub>4</sub> O <sub>2</sub>                 | [M+H] <sup>+</sup>  | Arginine                        |
| 23  | 184.0727     | 184.0739        | -6.52                | C <sub>5</sub> H <sub>15</sub> NO <sub>4</sub> P                             | [M+H] <sup>+</sup>  | Phosphorylcholine               |
|     | 206.0545     | 206.0558        | -6.31                |                                                                              | [M+Na] <sup>+</sup> |                                 |
| 24  | 188.1754     | 188.1757        | -1.59                | C <sub>9</sub> H <sub>21</sub> N <sub>3</sub> O                              | [M+H] <sup>+</sup>  | N1-Acetylspermidine and isomers |
|     | 210.1562     | 210.1577        | -7.14                |                                                                              | [M+Na] <sup>+</sup> |                                 |
| 25  | 203.2223     | 203.2230        | -3.44                | C <sub>10</sub> H <sub>26</sub> N <sub>4</sub>                               | [M+H] <sup>+</sup>  | Spermine                        |
|     | 225.2040     | 225.2050        | -4.44                |                                                                              | [M+Na] <sup>+</sup> |                                 |
| 26  | 203.0518     | 203.0526        | -3.94                | C <sub>6</sub> H <sub>12</sub> O <sub>6</sub>                                | [M+Na] <sup>+</sup> | Hexose                          |
|     | 219.0260     | 219.0265        | -2.28                |                                                                              | [M+K] <sup>+</sup>  |                                 |
| 27  | 204.1225     | 204.1230        | -2.45                | C <sub>9</sub> H <sub>17</sub> NO <sub>4</sub>                               | [M+H] <sup>+</sup>  | Acetylcarnitine                 |
| 28  | 218.1379     | 218.1387        | -3.67                | C <sub>10</sub> H <sub>19</sub> NO <sub>4</sub>                              | [M+H] <sup>+</sup>  | Propionylcarnitine              |
| 29  | 232.1536     | 232.1543        | -3.02                | C <sub>11</sub> H <sub>21</sub> NO <sub>4</sub>                              | [M+H] <sup>+</sup>  | Butyrylcarnitine and isomers    |
| 30  | 234.1332     | 234.1336        | -1.71                | C <sub>10</sub> H <sub>19</sub> NO <sub>5</sub>                              | [M+H] <sup>+</sup>  | Hydroxypropionylcarnitine       |
| 31  | 245.2325     | 245.2336        | -4.49                | C <sub>12</sub> H <sub>28</sub> N <sub>4</sub> O                             | [M+H] <sup>+</sup>  | N1-Acetylspermine               |
| 32  | 246.1695     | 246.1670        | -2.03                | C <sub>12</sub> H <sub>23</sub> NO <sub>4</sub>                              | [M+H] <sup>+</sup>  | Valerylcarnitine and isomers    |
| 33  | 258.1090     | 258.1101        | -4.26                | C <sub>8</sub> H <sub>20</sub> NO <sub>6</sub> P                             | [M+H] <sup>+</sup>  | Glycerophosphocholine           |
| 34  | 302.3039     | 302.3054        | -4.96                | C <sub>18</sub> H <sub>39</sub> NO <sub>2</sub>                              | [M+H] <sup>+</sup>  | Sphinganine                     |
| 35  | 318.2989     | 318.3003        | -4.40                | C <sub>18</sub> H <sub>39</sub> NO <sub>3</sub>                              | [M+H] <sup>+</sup>  | Phytosphingosine                |
| 36  | 379.0881     | 379.0893        | -3.17                | C <sub>16</sub> H <sub>19</sub> N <sub>4</sub> O <sub>3</sub> S <sub>2</sub> | [M] <sup>+</sup>    | NCBT-Cys                        |

The peak assignments were based on accurate mass measurements, comparison of isotopic patterns, information found in databases, such as Human metabolome database (<http://www.hmdb.ca/>), and some previous related literatures. The relative error of m/z values was set

as < 10 ppm. Protonated ion  $[M + H]^+$ , sodium adduct ion  $[M + Na]^+$ , and potassium adduct ion  $[M + K]^+$  peaks would be counted as one chemical.

## References

- 1 C. Zheng, L. Zheng, J. Yoo, H. Guo, Y. Zhang, X. Guo, B. Kang, R. Hu, J. Y. Huang, Q. Zhang, Z. Liu, M. Dong, X. Dong, X. Hu, W. Ouyang, J. Peng and Z. Zhang, *Cell*, 2017, **169**, 1342-1356.
- 2 J. A. Paulo, J. D. O'Connell, R. A. Everley, J. O'Brien, M. A. Gygi and S. P. Gygi, *J. Proteomics*, 2016, **148**, 85-93.
- 3 N. Jacob, E. Bruckert, P. Giral, M. J. Foglietti and G. Turpin, *Atherosclerosis*, 1999, **146**, 53-59.
- 4 L. El-Khairi, P. M. Ueland, H. Refsum, I. M. Graham and S. E. Vollset, *Circulation*, 2001, **103**, 2544-2549.
